# Supplementary material for: Orthrus: a Pumilio-family gene involved in fruiting body and dark stipe development in Coprinopsis cinerea
Source: Frontiers journal article supplement (doi:10.3389/ffunb.2025.1633301), 2025-07-30
Supplement: Table_6.xlsx [file Table_6.xlsx]

## Sheet: targets_LM_okayama
CC1G_00022
CC1G_00030
CC1G_00037
CC1G_00091
CC1G_00097
CC1G_00151
CC1G_00165
CC1G_00195
CC1G_00222
CC1G_00232
CC1G_00237
CC1G_00262
CC1G_00273
CC1G_00298
CC1G_00300
CC1G_00304
CC1G_00305
CC1G_00345
CC1G_00354
CC1G_00360
CC1G_00371
CC1G_00372
CC1G_00387
CC1G_00391
CC1G_00465
CC1G_00466
CC1G_00468
CC1G_00496
CC1G_00506
CC1G_00508
CC1G_00545
CC1G_00565
CC1G_00567
CC1G_00593
CC1G_00604
CC1G_00647
CC1G_00668
CC1G_00690
CC1G_00696
CC1G_00707
CC1G_00730
CC1G_00770
CC1G_00804
CC1G_00855
CC1G_00872
CC1G_00880
CC1G_00900
CC1G_00923
CC1G_00950
CC1G_00971
CC1G_00978
CC1G_00989
CC1G_01012
CC1G_01045
CC1G_01048
CC1G_01090
CC1G_01091
CC1G_01112
CC1G_01119
CC1G_01139
CC1G_01146
CC1G_01259
CC1G_01261
CC1G_01262
CC1G_01315
CC1G_01320
CC1G_01323
CC1G_01336
CC1G_01339
CC1G_01341
CC1G_01344
CC1G_01346
CC1G_01347
CC1G_01359
CC1G_01372
CC1G_01407
CC1G_01411
CC1G_01412
CC1G_01458
CC1G_01504
CC1G_01512
CC1G_01581
CC1G_01584
CC1G_01595
CC1G_01644
CC1G_01645
CC1G_01676
CC1G_01677
CC1G_01704
CC1G_01705
CC1G_01712
CC1G_01742
CC1G_01748
CC1G_01749
CC1G_01782
CC1G_01810
CC1G_01853
CC1G_01858
CC1G_01859
CC1G_01868
CC1G_01869
CC1G_01879
CC1G_01881
CC1G_01888
CC1G_01895
CC1G_01923
CC1G_01951
CC1G_01956
CC1G_01982
CC1G_01986
CC1G_01988
CC1G_02009
CC1G_02029
CC1G_02033
CC1G_02034
CC1G_02037
CC1G_02112
CC1G_02139
CC1G_02159
CC1G_02165
CC1G_02201
CC1G_02239
CC1G_02267
CC1G_02273
CC1G_02302
CC1G_02331
CC1G_02345
CC1G_02383
CC1G_02405
CC1G_02420
CC1G_02471
CC1G_02511
CC1G_02525
CC1G_02529
CC1G_02563
CC1G_02576
CC1G_02577
CC1G_02580
CC1G_02596
CC1G_02616
CC1G_02622
CC1G_02650
CC1G_02668
CC1G_02678
CC1G_02718
CC1G_02758
CC1G_02785
CC1G_02830
CC1G_02858
CC1G_02883
CC1G_02924
CC1G_02966
CC1G_02978
CC1G_02980
CC1G_03014
CC1G_03016
CC1G_03017
CC1G_03021
CC1G_03066
CC1G_03067
CC1G_03113
CC1G_03117
CC1G_03153
CC1G_03160
CC1G_03165
CC1G_03170
CC1G_03185
CC1G_03252
CC1G_03254
CC1G_03295
CC1G_03298
CC1G_03324
CC1G_03344
CC1G_03365
CC1G_03371
CC1G_03429
CC1G_03433
CC1G_03447
CC1G_03458
CC1G_03481
CC1G_03496
CC1G_03501
CC1G_03506
CC1G_03539
CC1G_03553
CC1G_03554
CC1G_03556
CC1G_03576
CC1G_03589
CC1G_03590
CC1G_03603
CC1G_03619
CC1G_03628
CC1G_03629
CC1G_03665
CC1G_03674
CC1G_03723
CC1G_03759
CC1G_03837
CC1G_03838
CC1G_03875
CC1G_03879
CC1G_03895
CC1G_03923
CC1G_03952
CC1G_04013
CC1G_04096
CC1G_04156
CC1G_04183
CC1G_04199
CC1G_04228
CC1G_04234
CC1G_04235
CC1G_04282
CC1G_04314
CC1G_04317
CC1G_04318
CC1G_04334
CC1G_04351
CC1G_04368
CC1G_04392
CC1G_04394
CC1G_04407
CC1G_04425
CC1G_04442
CC1G_04490
CC1G_04524
CC1G_04528
CC1G_04569
CC1G_04594
CC1G_04595
CC1G_04667
CC1G_04684
CC1G_04722
CC1G_04783
CC1G_04786
CC1G_04863
CC1G_04872
CC1G_04889
CC1G_04899
CC1G_04912
CC1G_04940
CC1G_04948
CC1G_04990
CC1G_05007
CC1G_05012
CC1G_05033
CC1G_05040
CC1G_05107
CC1G_05110
CC1G_05112
CC1G_05125
CC1G_05126
CC1G_05146
CC1G_05159
CC1G_05166
CC1G_05171
CC1G_05179
CC1G_05197
CC1G_05291
CC1G_05301
CC1G_05306
CC1G_05322
CC1G_05323
CC1G_05327
CC1G_05328
CC1G_05366
CC1G_05378
CC1G_05408
CC1G_05441
CC1G_05467
CC1G_05494
CC1G_05510
CC1G_05573
CC1G_05579
CC1G_05580
CC1G_05599
CC1G_05604
CC1G_05605
CC1G_05656
CC1G_05693
CC1G_05709
CC1G_05727
CC1G_05781
CC1G_05787
CC1G_05790
CC1G_05820
CC1G_05822
CC1G_05861
CC1G_05932
CC1G_05960
CC1G_05982
CC1G_06002
CC1G_06006
CC1G_06012
CC1G_06097
CC1G_06103
CC1G_06127
CC1G_06133
CC1G_06138
CC1G_06142
CC1G_06171
CC1G_06211
CC1G_06221
CC1G_06224
CC1G_06279
CC1G_06309
CC1G_06321
CC1G_06326
CC1G_06378
CC1G_06390
CC1G_06434
CC1G_06451
CC1G_06456
CC1G_06506
CC1G_06564
CC1G_06569
CC1G_06576
CC1G_06580
CC1G_06625
CC1G_06649
CC1G_06652
CC1G_06654
CC1G_06718
CC1G_06720
CC1G_06722
CC1G_06779
CC1G_06786
CC1G_06793
CC1G_06807
CC1G_06816
CC1G_06827
CC1G_06861
CC1G_06884
CC1G_06885
CC1G_06905
CC1G_06906
CC1G_06916
CC1G_06944
CC1G_07046
CC1G_07047
CC1G_07049
CC1G_07080
CC1G_07097
CC1G_07109
CC1G_07110
CC1G_07125
CC1G_07183
CC1G_07184
CC1G_07192
CC1G_07224
CC1G_07229
CC1G_07243
CC1G_07264
CC1G_07267
CC1G_07268
CC1G_07299
CC1G_07304
CC1G_07338
CC1G_07373
CC1G_07386
CC1G_07400
CC1G_07410
CC1G_07414
CC1G_07428
CC1G_07431
CC1G_07519
CC1G_07528
CC1G_07531
CC1G_07571
CC1G_07593
CC1G_07605
CC1G_07635
CC1G_07657
CC1G_07659
CC1G_07676
CC1G_07679
CC1G_07691
CC1G_07740
CC1G_07742
CC1G_07746
CC1G_07782
CC1G_07809
CC1G_07853
CC1G_07858
CC1G_07903
CC1G_07919
CC1G_07922
CC1G_07932
CC1G_07934
CC1G_07935
CC1G_07945
CC1G_07957
CC1G_07961
CC1G_07967
CC1G_08002
CC1G_08009
CC1G_08014
CC1G_08034
CC1G_08055
CC1G_08061
CC1G_08080
CC1G_08092
CC1G_08195
CC1G_08219
CC1G_08247
CC1G_08250
CC1G_08252
CC1G_08306
CC1G_08309
CC1G_08322
CC1G_08336
CC1G_08391
CC1G_08393
CC1G_08394
CC1G_08499
CC1G_08518
CC1G_08593
CC1G_08619
CC1G_08626
CC1G_08645
CC1G_08650
CC1G_08655
CC1G_08656
CC1G_08671
CC1G_08681
CC1G_08697
CC1G_08698
CC1G_08725
CC1G_08760
CC1G_08768
CC1G_08786
CC1G_08787
CC1G_08804
CC1G_08833
CC1G_08841
CC1G_08897
CC1G_08904
CC1G_08907
CC1G_08915
CC1G_08916
CC1G_08917
CC1G_08922
CC1G_08984
CC1G_09008
CC1G_09066
CC1G_09078
CC1G_09089
CC1G_09111
CC1G_09146
CC1G_09152
CC1G_09161
CC1G_09162
CC1G_09170
CC1G_09173
CC1G_09182
CC1G_09221
CC1G_09243
CC1G_09254
CC1G_09313
CC1G_09334
CC1G_09349
CC1G_09358
CC1G_09374
CC1G_09395
CC1G_09402
CC1G_09405
CC1G_09413
CC1G_09430
CC1G_09443
CC1G_09480
CC1G_09481
CC1G_09511
CC1G_09515
CC1G_09517
CC1G_09556
CC1G_09559
CC1G_09560
CC1G_09588
CC1G_09604
CC1G_09624
CC1G_09625
CC1G_09658
CC1G_09674
CC1G_09719
CC1G_09722
CC1G_09770
CC1G_09795
CC1G_09805
CC1G_09811
CC1G_09829
CC1G_09830
CC1G_09835
CC1G_09891
CC1G_09908
CC1G_09912
CC1G_09916
CC1G_09970
CC1G_09978
CC1G_09980
CC1G_09983
CC1G_10002
CC1G_10036
CC1G_10037
CC1G_10048
CC1G_10058
CC1G_10065
CC1G_10073
CC1G_10144
CC1G_10156
CC1G_10178
CC1G_10201
CC1G_10206
CC1G_10216
CC1G_10246
CC1G_10268
CC1G_10289
CC1G_10290
CC1G_10295
CC1G_10309
CC1G_10335
CC1G_10351
CC1G_10356
CC1G_10366
CC1G_10387
CC1G_10406
CC1G_10411
CC1G_10437
CC1G_10452
CC1G_10484
CC1G_10494
CC1G_10509
CC1G_10525
CC1G_10531
CC1G_10534
CC1G_10547
CC1G_10574
CC1G_10584
CC1G_10587
CC1G_10592
CC1G_10593
CC1G_10594
CC1G_10595
CC1G_10607
CC1G_10621
CC1G_10633
CC1G_10665
CC1G_10704
CC1G_10714
CC1G_10723
CC1G_10747
CC1G_10754
CC1G_10787
CC1G_10797
CC1G_10811
CC1G_10890
CC1G_10916
CC1G_10919
CC1G_10930
CC1G_10933
CC1G_10937
CC1G_10947
CC1G_10953
CC1G_10987
CC1G_11008
CC1G_11009
CC1G_11060
CC1G_11070
CC1G_11079
CC1G_11080
CC1G_11087
CC1G_11088
CC1G_11144
CC1G_11146
CC1G_11152
CC1G_11184
CC1G_11208
CC1G_11223
CC1G_11282
CC1G_11424
CC1G_11442
CC1G_11447
CC1G_11459
CC1G_11474
CC1G_11511
CC1G_11528
CC1G_11603
CC1G_11653
CC1G_11665
CC1G_11679
CC1G_11703
CC1G_11704
CC1G_11727
CC1G_11784
CC1G_11804
CC1G_11810
CC1G_11819
CC1G_11850
CC1G_11851
CC1G_11855
CC1G_11856
CC1G_11883
CC1G_11914
CC1G_11931
CC1G_11933
CC1G_11946
CC1G_11963
CC1G_11982
CC1G_11998
CC1G_12014
CC1G_12015
CC1G_12046
CC1G_12054
CC1G_12062
CC1G_12068
CC1G_12091
CC1G_12101
CC1G_12126
CC1G_12128
CC1G_12129
CC1G_12135
CC1G_12155
CC1G_12157
CC1G_12159
CC1G_12175
CC1G_12181
CC1G_12219
CC1G_12227
CC1G_12229
CC1G_12231
CC1G_12259
CC1G_12266
CC1G_12283
CC1G_12298
CC1G_12340
CC1G_12348
CC1G_12400
CC1G_12401
CC1G_12414
CC1G_12438
CC1G_12454
CC1G_12468
CC1G_12469
CC1G_12485
CC1G_12570
CC1G_12582
CC1G_12594
CC1G_12693
CC1G_12715
CC1G_12804
CC1G_12842
CC1G_12843
CC1G_12927
CC1G_12975
CC1G_12992
CC1G_13048
CC1G_13049
CC1G_13051
CC1G_13071
CC1G_13202
CC1G_13261
CC1G_13267
CC1G_13284
CC1G_13296
CC1G_13434
CC1G_13488
CC1G_13541
CC1G_13545
CC1G_13573
CC1G_13585
CC1G_13607
CC1G_13662
CC1G_13671
CC1G_13678
CC1G_13687
CC1G_13774
CC1G_13777
CC1G_13797
CC1G_13822
CC1G_13867
CC1G_13875
CC1G_13914
CC1G_13934
CC1G_13937
CC1G_13954
CC1G_13955
CC1G_13982
CC1G_14040
CC1G_14060
CC1G_14080
CC1G_14088
CC1G_14096
CC1G_14101
CC1G_14114
CC1G_14117
CC1G_14212
CC1G_14219
CC1G_14221
CC1G_14222
CC1G_14236
CC1G_14260
CC1G_14305
CC1G_14360
CC1G_14362
CC1G_14384
CC1G_14411
CC1G_14420
CC1G_14454
CC1G_14488
CC1G_14489
CC1G_14526
CC1G_14541
CC1G_14542
CC1G_14546
CC1G_14598
CC1G_14627
CC1G_14662
CC1G_14700
CC1G_14735
CC1G_14759
CC1G_14795
CC1G_14803
CC1G_14828
CC1G_14841
CC1G_14868
CC1G_14869
CC1G_14917
CC1G_14935
CC1G_14946
CC1G_14957
CC1G_15003
CC1G_15012
CC1G_15033
CC1G_15042
CC1G_15102
CC1G_15108
CC1G_15133
CC1G_15135
CC1G_15154
CC1G_15157
CC1G_15159
CC1G_15168
CC1G_15192
CC1G_15268
CC1G_15326
CC1G_15334
CC1G_15343
CC1G_15354
CC1G_15361
CC1G_15402
CC1G_15404
CC1G_15405
CC1G_15437
CC1G_15443
CC1G_15467
CC1G_15483
CC1G_15509
CC1G_15518
CC1G_15520
CC1G_15531
CC1G_15550
CC1G_15560
CC1G_15562
CC1G_15568
CC1G_15593
CC1G_15657
CC1G_15689
CC1G_15710
CC1G_15762
CC1G_15788
CC1G_15853
CC1G_22005

## Sheet: targets_LM_AmutBmut
CopciAB_472061
CopciAB_357053
CopciAB_471999
CopciAB_544982
CopciAB_361036
CopciAB_543657
CopciAB_357468
CopciAB_357521
CopciAB_493867
CopciAB_472659
CopciAB_414375
CopciAB_283650
CopciAB_414580
CopciAB_282469
CopciAB_446556
CopciAB_500316
CopciAB_449882
CopciAB_189663
CopciAB_462946
CopciAB_354859
CopciAB_454409
CopciAB_538657
CopciAB_439986
CopciAB_359876
CopciAB_494808
CopciAB_359811
CopciAB_464275
CopciAB_354711
CopciAB_545933
CopciAB_116852
CopciAB_546533
CopciAB_494887
CopciAB_360116
CopciAB_494863
CopciAB_494851
CopciAB_416935
CopciAB_420644
CopciAB_446519
CopciAB_1000272
CopciAB_474858
CopciAB_254617
CopciAB_531188
CopciAB_449315
CopciAB_490628
CopciAB_459848
CopciAB_443425
CopciAB_433347
CopciAB_474838
CopciAB_450047
CopciAB_472621
CopciAB_493874
CopciAB_473127
CopciAB_357594
CopciAB_475005
CopciAB_464631
CopciAB_408181
CopciAB_450144
CopciAB_544907
CopciAB_429733
CopciAB_370149
CopciAB_370105
CopciAB_368906
CopciAB_490617
CopciAB_462948
CopciAB_454395
CopciAB_484892
CopciAB_357703
CopciAB_280709
CopciAB_474787
CopciAB_439982
CopciAB_390486
CopciAB_454418
CopciAB_545936
CopciAB_432360
CopciAB_380146
CopciAB_360169
CopciAB_260659
CopciAB_260599
CopciAB_449659
CopciAB_478851
CopciAB_507297
CopciAB_546392
CopciAB_545612
CopciAB_454515
CopciAB_354440
CopciAB_359920
CopciAB_376687
CopciAB_357231
CopciAB_414986
CopciAB_505644
CopciAB_388657
CopciAB_461862
CopciAB_414748
CopciAB_360424
CopciAB_440744
CopciAB_393135
CopciAB_363821
CopciAB_496260
CopciAB_445851
CopciAB_451261
CopciAB_353997
CopciAB_354157
CopciAB_354296
CopciAB_6218
CopciAB_480059
CopciAB_501262
CopciAB_436360
CopciAB_450594
CopciAB_481295
CopciAB_442154
CopciAB_495268
CopciAB_361288
CopciAB_361138
CopciAB_495201
CopciAB_462049
CopciAB_442838
CopciAB_119480
CopciAB_406568
CopciAB_443181
CopciAB_501838
CopciAB_373418
CopciAB_439073
CopciAB_402760
CopciAB_399242
CopciAB_379242
CopciAB_407897
CopciAB_32193
CopciAB_545544
CopciAB_530113
CopciAB_384105
CopciAB_411346
CopciAB_436813
CopciAB_377178
CopciAB_503503
CopciAB_348218
CopciAB_82537
CopciAB_461764
CopciAB_417649
CopciAB_495203
CopciAB_438977
CopciAB_9737
CopciAB_451372
CopciAB_540457
CopciAB_420136
CopciAB_451223
CopciAB_537378
CopciAB_436862
CopciAB_473654
CopciAB_499276
CopciAB_1000530
CopciAB_442129
CopciAB_417694
CopciAB_361309
CopciAB_417654
CopciAB_119597
CopciAB_480702
CopciAB_374839
CopciAB_440220
CopciAB_374824
CopciAB_545650
CopciAB_31613
CopciAB_547398
CopciAB_432170
CopciAB_483436
CopciAB_502644
CopciAB_436985
CopciAB_353910
CopciAB_545850
CopciAB_432177
CopciAB_406427
CopciAB_414749
CopciAB_73272
CopciAB_500564
CopciAB_450564
CopciAB_193545
CopciAB_193478
CopciAB_193231
CopciAB_191140
CopciAB_493632
CopciAB_356780
CopciAB_493610
CopciAB_484637
CopciAB_493580
CopciAB_451456
CopciAB_358869
CopciAB_438649
CopciAB_359087
CopciAB_389833
CopciAB_359138
CopciAB_494516
CopciAB_427075
CopciAB_439759
CopciAB_461496
CopciAB_426049
CopciAB_121142
CopciAB_508801
CopciAB_559334
CopciAB_234233
CopciAB_359179
CopciAB_474359
CopciAB_545124
CopciAB_70251
CopciAB_371582
CopciAB_197988
CopciAB_1000898
CopciAB_356460
CopciAB_471299
CopciAB_356546
CopciAB_438716
CopciAB_493245
CopciAB_493218
CopciAB_355732
CopciAB_503155
CopciAB_448649
CopciAB_493583
CopciAB_370722
CopciAB_372454
CopciAB_448880
CopciAB_530292
CopciAB_432406
CopciAB_539165
CopciAB_463557
CopciAB_451038
CopciAB_461500
CopciAB_418156
CopciAB_361590
CopciAB_41230
CopciAB_499740
CopciAB_538262
CopciAB_234699
CopciAB_413333
CopciAB_493324
CopciAB_401031
CopciAB_427108
CopciAB_493285
CopciAB_446420
CopciAB_375066
CopciAB_427036
CopciAB_471337
CopciAB_366970
CopciAB_459666
CopciAB_366917
CopciAB_448712
CopciAB_501998
CopciAB_500747
CopciAB_516537
CopciAB_115138
CopciAB_257118
CopciAB_368055
CopciAB_500243
CopciAB_374214
CopciAB_438145
CopciAB_438081
CopciAB_452062
CopciAB_451488
CopciAB_492299
CopciAB_397292
CopciAB_116024
CopciAB_116464
CopciAB_128772
CopciAB_540317
CopciAB_498782
CopciAB_370507
CopciAB_291372
CopciAB_291690
CopciAB_383650
CopciAB_380110
CopciAB_502994
CopciAB_366768
CopciAB_491853
CopciAB_240454
CopciAB_503052
CopciAB_367547
CopciAB_247705
CopciAB_471772
CopciAB_476660
CopciAB_417834
CopciAB_471199
CopciAB_231740
CopciAB_494308
CopciAB_426459
CopciAB_410280
CopciAB_478544
CopciAB_367455
CopciAB_487527
CopciAB_503001
CopciAB_545020
CopciAB_128386
CopciAB_362494
CopciAB_141731
CopciAB_362439
CopciAB_418834
CopciAB_369363
CopciAB_369434
CopciAB_535364
CopciAB_396082
CopciAB_378573
CopciAB_457218
CopciAB_377589
CopciAB_472860
CopciAB_358558
CopciAB_383564
CopciAB_503975
CopciAB_462732
CopciAB_485193
CopciAB_502995
CopciAB_366593
CopciAB_473451
CopciAB_30849
CopciAB_378125
CopciAB_359613
CopciAB_439647
CopciAB_355051
CopciAB_467853
CopciAB_444565
CopciAB_467760
CopciAB_444494
CopciAB_474027
CopciAB_492977
CopciAB_458586
CopciAB_447475
CopciAB_421651
CopciAB_496907
CopciAB_470416
CopciAB_1001143
CopciAB_496946
CopciAB_447558
CopciAB_496930
CopciAB_214079
CopciAB_477829
CopciAB_494253
CopciAB_19505
CopciAB_443456
CopciAB_381690
CopciAB_504255
CopciAB_468400
CopciAB_496085
CopciAB_507893
CopciAB_374278
CopciAB_439839
CopciAB_445594
CopciAB_464916
CopciAB_430827
CopciAB_500803
CopciAB_496521
CopciAB_403897
CopciAB_403911
CopciAB_367232
CopciAB_530121
CopciAB_462560
CopciAB_451916
CopciAB_359534
CopciAB_412527
CopciAB_355148
CopciAB_412433
CopciAB_355044
CopciAB_355087
CopciAB_157784
CopciAB_412248
CopciAB_355064
CopciAB_492992
CopciAB_492974
CopciAB_458587
CopciAB_421646
CopciAB_214051
CopciAB_365699
CopciAB_445561
CopciAB_20997
CopciAB_506733
CopciAB_468408
CopciAB_468406
CopciAB_32294
CopciAB_510802
CopciAB_449677
CopciAB_501639
CopciAB_466395
CopciAB_464908
CopciAB_453855
CopciAB_462226
CopciAB_440151
CopciAB_445334
CopciAB_381928
CopciAB_541713
CopciAB_228567
CopciAB_367186
CopciAB_56787
CopciAB_157687
CopciAB_547393
CopciAB_376208
CopciAB_480153
CopciAB_500061
CopciAB_546344
CopciAB_439412
CopciAB_365747
CopciAB_497001
CopciAB_470651
CopciAB_367905
CopciAB_473512
CopciAB_498737
CopciAB_463313
CopciAB_430735
CopciAB_440704
CopciAB_1002042
CopciAB_482459
CopciAB_374316
CopciAB_1001985
CopciAB_186783
CopciAB_442228
CopciAB_496985
CopciAB_367957
CopciAB_451131
CopciAB_498859
CopciAB_461481
CopciAB_498732
CopciAB_385219
CopciAB_402516
CopciAB_463302
CopciAB_440709
CopciAB_440703
CopciAB_463032
CopciAB_1001961
CopciAB_373760
CopciAB_468628
CopciAB_497796
CopciAB_471828
CopciAB_397547
CopciAB_466938
CopciAB_362260
CopciAB_257634
CopciAB_496338
CopciAB_470588
CopciAB_447202
CopciAB_503585
CopciAB_476624
CopciAB_502284
CopciAB_497921
CopciAB_445528
CopciAB_501010
CopciAB_437876
CopciAB_371009
CopciAB_445901
CopciAB_473500
CopciAB_250393
CopciAB_367776
CopciAB_468021
CopciAB_476580
CopciAB_1001284
CopciAB_364053
CopciAB_465489
CopciAB_170477
CopciAB_220010
CopciAB_447176
CopciAB_371036
CopciAB_467437
CopciAB_382107
CopciAB_543653
CopciAB_543646
CopciAB_530989
CopciAB_476590
CopciAB_445902
CopciAB_216726
CopciAB_495583
CopciAB_466786
CopciAB_439521
CopciAB_502204
CopciAB_447977
CopciAB_222978
CopciAB_448025
CopciAB_481141
CopciAB_444168
CopciAB_226466
CopciAB_366442
CopciAB_370035
CopciAB_450865
CopciAB_496841
CopciAB_541323
CopciAB_488321
CopciAB_503283
CopciAB_441442
CopciAB_540379
CopciAB_444059
CopciAB_439356
CopciAB_373736
CopciAB_500927
CopciAB_478386
CopciAB_378072
CopciAB_483457
CopciAB_410143
CopciAB_367082
CopciAB_286471
CopciAB_241444
CopciAB_1001574
CopciAB_383677
CopciAB_540189
CopciAB_418543
CopciAB_440286
CopciAB_223186
CopciAB_497189
CopciAB_448201
CopciAB_274600
CopciAB_450296
CopciAB_362606
CopciAB_419083
CopciAB_53019
CopciAB_442027
CopciAB_367023
CopciAB_466591
CopciAB_405504
CopciAB_465758
CopciAB_413057
CopciAB_1001598
CopciAB_457459
CopciAB_500620
CopciAB_77696
CopciAB_442991
CopciAB_420840
CopciAB_446838
CopciAB_446854
CopciAB_371091
CopciAB_457019
CopciAB_274427
CopciAB_439325
CopciAB_278262
CopciAB_545670
CopciAB_499986
CopciAB_452781
CopciAB_373555
CopciAB_544595
CopciAB_500364
CopciAB_361786
CopciAB_1001741
CopciAB_439276
CopciAB_470359
CopciAB_383554
CopciAB_418410
CopciAB_465232
CopciAB_466541
CopciAB_361837
CopciAB_364667
CopciAB_446813
CopciAB_446815
CopciAB_446855
CopciAB_363541
CopciAB_175000
CopciAB_445432
CopciAB_503382
CopciAB_500026
CopciAB_361801
CopciAB_207071
CopciAB_445417
CopciAB_489193
CopciAB_203508
CopciAB_364858
CopciAB_441951
CopciAB_540517
CopciAB_472459
CopciAB_444706
CopciAB_476867
CopciAB_261924
CopciAB_1002309
CopciAB_185522
CopciAB_427232
CopciAB_445037
CopciAB_1002094
CopciAB_37449
CopciAB_486952
CopciAB_364886
CopciAB_499390
CopciAB_498986
CopciAB_426597
CopciAB_495936
CopciAB_486427
CopciAB_516746
CopciAB_498562
CopciAB_465163
CopciAB_444720
CopciAB_489308
CopciAB_368617
CopciAB_23471
CopciAB_91051
CopciAB_91242
CopciAB_488369
CopciAB_488422
CopciAB_419979
CopciAB_420050
CopciAB_501474
CopciAB_375846
CopciAB_545067
CopciAB_499145
CopciAB_437509
CopciAB_400918
CopciAB_465102
CopciAB_360684
CopciAB_275871
CopciAB_499568
CopciAB_502514
CopciAB_427679
CopciAB_479937
CopciAB_1000157
CopciAB_275652
CopciAB_365130
CopciAB_496741
CopciAB_404475
CopciAB_544873
CopciAB_1002402
CopciAB_380084
CopciAB_436497
CopciAB_449595
CopciAB_469992
CopciAB_486983
CopciAB_1002192
CopciAB_354547
CopciAB_523274
CopciAB_421232
CopciAB_499059
CopciAB_354559
CopciAB_465379
CopciAB_441591
CopciAB_514707
CopciAB_385464
CopciAB_482858
CopciAB_372619
CopciAB_428080
CopciAB_35967
CopciAB_478815
CopciAB_368245
CopciAB_483280
CopciAB_481987
CopciAB_382851
CopciAB_379954
CopciAB_408843
CopciAB_465446
CopciAB_443371
CopciAB_442931
CopciAB_546322
CopciAB_382283
CopciAB_446986
CopciAB_480928
CopciAB_374
CopciAB_436798
CopciAB_496402
CopciAB_477342
CopciAB_467477
CopciAB_393558
CopciAB_547334
CopciAB_476967
CopciAB_363282
CopciAB_379469
CopciAB_409510
CopciAB_492524
CopciAB_354120
CopciAB_461610
CopciAB_176106
CopciAB_482713
CopciAB_440496

## Sheet: targets_FIMO
CopciAB_1000481
CopciAB_1000994
CopciAB_1001367
CopciAB_1001375
CopciAB_105562
CopciAB_122698
CopciAB_160527
CopciAB_164659
CopciAB_173684
CopciAB_176301
CopciAB_19106
CopciAB_194805
CopciAB_203507
CopciAB_223933
CopciAB_240454
CopciAB_2422
CopciAB_253399
CopciAB_267343
CopciAB_272609
CopciAB_272792
CopciAB_30510
CopciAB_354219
CopciAB_354280
CopciAB_355727
CopciAB_356526
CopciAB_358849
CopciAB_359138
CopciAB_359285
CopciAB_359940
CopciAB_360541
CopciAB_363298
CopciAB_369975
CopciAB_372150
CopciAB_378537
CopciAB_378571
CopciAB_3796
CopciAB_383727
CopciAB_386292
CopciAB_388897
CopciAB_389532
CopciAB_394549
CopciAB_395141
CopciAB_397382
CopciAB_398695
CopciAB_402715
CopciAB_41081
CopciAB_419773
CopciAB_428537
CopciAB_435498
CopciAB_437624
CopciAB_438569
CopciAB_438660
CopciAB_440024
CopciAB_440201
CopciAB_440258
CopciAB_440431
CopciAB_440435
CopciAB_440521
CopciAB_440799
CopciAB_441053
CopciAB_441713
CopciAB_442716
CopciAB_445120
CopciAB_445701
CopciAB_445777
CopciAB_446134
CopciAB_446272
CopciAB_446722
CopciAB_446742
CopciAB_448193
CopciAB_448482
CopciAB_448596
CopciAB_449420
CopciAB_449567
CopciAB_451069
CopciAB_453252
CopciAB_455623
CopciAB_455699
CopciAB_457022
CopciAB_461849
CopciAB_463096
CopciAB_463518
CopciAB_464488
CopciAB_465815
CopciAB_466739
CopciAB_467207
CopciAB_467339
CopciAB_467951
CopciAB_468062
CopciAB_468688
CopciAB_471638
CopciAB_472280
CopciAB_484001
CopciAB_485679
CopciAB_487372
CopciAB_491915
CopciAB_492571
CopciAB_492885
CopciAB_492927
CopciAB_493846
CopciAB_494680
CopciAB_495637
CopciAB_496348
CopciAB_496351
CopciAB_496380
CopciAB_497619
CopciAB_497690
CopciAB_498732
CopciAB_502146
CopciAB_502568
CopciAB_502639
CopciAB_503392
CopciAB_504757
CopciAB_547025
CopciAB_81503
CopciAB_87167

## Sheet: mt_GO_okayama
CC1G_00014
CC1G_00021
CC1G_00032
CC1G_00037
CC1G_00051
CC1G_00055
CC1G_00058
CC1G_00066
CC1G_00075
CC1G_00077
CC1G_00083
CC1G_00090
CC1G_00110
CC1G_00127
CC1G_00134
CC1G_00135
CC1G_00164
CC1G_00181
CC1G_00197
CC1G_00229
CC1G_00248
CC1G_00276
CC1G_00294
CC1G_00296
CC1G_00301
CC1G_00337
CC1G_00350
CC1G_00366
CC1G_00372
CC1G_00383
CC1G_00397
CC1G_00421
CC1G_00425
CC1G_00460
CC1G_00461
CC1G_00482
CC1G_00485
CC1G_00506
CC1G_00544
CC1G_00567
CC1G_00576
CC1G_00611
CC1G_00622
CC1G_00694
CC1G_00721
CC1G_00725
CC1G_00726
CC1G_00729
CC1G_00787
CC1G_00798
CC1G_00820
CC1G_00829
CC1G_00842
CC1G_00860
CC1G_00861
CC1G_00862
CC1G_00868
CC1G_00875
CC1G_00883
CC1G_00927
CC1G_00935
CC1G_00949
CC1G_00963
CC1G_00964
CC1G_00984
CC1G_01002
CC1G_01012
CC1G_01037
CC1G_01074
CC1G_01077
CC1G_01082
CC1G_01087
CC1G_01108
CC1G_01111
CC1G_01115
CC1G_01137
CC1G_01142
CC1G_01153
CC1G_01178
CC1G_01181
CC1G_01189
CC1G_01249
CC1G_01259
CC1G_01270
CC1G_01296
CC1G_01299
CC1G_01312
CC1G_01324
CC1G_01327
CC1G_01335
CC1G_01338
CC1G_01347
CC1G_01373
CC1G_01387
CC1G_01401
CC1G_01405
CC1G_01411
CC1G_01424
CC1G_01453
CC1G_01520
CC1G_01532
CC1G_01555
CC1G_01608
CC1G_01674
CC1G_01697
CC1G_01701
CC1G_01709
CC1G_01718
CC1G_01729
CC1G_01738
CC1G_01742
CC1G_01743
CC1G_01773
CC1G_01813
CC1G_01817
CC1G_01824
CC1G_01835
CC1G_01843
CC1G_01861
CC1G_01882
CC1G_01888
CC1G_01900
CC1G_01935
CC1G_01940
CC1G_01971
CC1G_01988
CC1G_01999
CC1G_02024
CC1G_02041
CC1G_02049
CC1G_02051
CC1G_02083
CC1G_02085
CC1G_02094
CC1G_02167
CC1G_02171
CC1G_02229
CC1G_02260
CC1G_02372
CC1G_02392
CC1G_02439
CC1G_02500
CC1G_02511
CC1G_02552
CC1G_02587
CC1G_02588
CC1G_02641
CC1G_02645
CC1G_02646
CC1G_02650
CC1G_02672
CC1G_02747
CC1G_02760
CC1G_02871
CC1G_02878
CC1G_02894
CC1G_02917
CC1G_02931
CC1G_03012
CC1G_03025
CC1G_03058
CC1G_03083
CC1G_03104
CC1G_03205
CC1G_03254
CC1G_03271
CC1G_03307
CC1G_03327
CC1G_03355
CC1G_03377
CC1G_03409
CC1G_03453
CC1G_03454
CC1G_03456
CC1G_03463
CC1G_03466
CC1G_03467
CC1G_03472
CC1G_03511
CC1G_03512
CC1G_03553
CC1G_03559
CC1G_03574
CC1G_03624
CC1G_03625
CC1G_03627
CC1G_03657
CC1G_03661
CC1G_03682
CC1G_03691
CC1G_03702
CC1G_03707
CC1G_03726
CC1G_03730
CC1G_03754
CC1G_03760
CC1G_03772
CC1G_03787
CC1G_03789
CC1G_03798
CC1G_03799
CC1G_03826
CC1G_03830
CC1G_03850
CC1G_03856
CC1G_03862
CC1G_03871
CC1G_03876
CC1G_03889
CC1G_03898
CC1G_03909
CC1G_03921
CC1G_04008
CC1G_04010
CC1G_04041
CC1G_04070
CC1G_04079
CC1G_04113
CC1G_04120
CC1G_04181
CC1G_04192
CC1G_04199
CC1G_04223
CC1G_04236
CC1G_04241
CC1G_04242
CC1G_04250
CC1G_04268
CC1G_04280
CC1G_04286
CC1G_04297
CC1G_04377
CC1G_04385
CC1G_04395
CC1G_04425
CC1G_04485
CC1G_04498
CC1G_04510
CC1G_04553
CC1G_04556
CC1G_04608
CC1G_04649
CC1G_04695
CC1G_04795
CC1G_04835
CC1G_04850
CC1G_04855
CC1G_04957
CC1G_04972
CC1G_04981
CC1G_04987
CC1G_05027
CC1G_05055
CC1G_05087
CC1G_05090
CC1G_05097
CC1G_05119
CC1G_05134
CC1G_05142
CC1G_05163
CC1G_05173
CC1G_05190
CC1G_05191
CC1G_05217
CC1G_05237
CC1G_05249
CC1G_05258
CC1G_05267
CC1G_05294
CC1G_05301
CC1G_05332
CC1G_05387
CC1G_05398
CC1G_05541
CC1G_05737
CC1G_05743
CC1G_05758
CC1G_05803
CC1G_05908
CC1G_05942
CC1G_06004
CC1G_06015
CC1G_06058
CC1G_06084
CC1G_06087
CC1G_06132
CC1G_06181
CC1G_06191
CC1G_06197
CC1G_06234
CC1G_06249
CC1G_06253
CC1G_06259
CC1G_06294
CC1G_06303
CC1G_06305
CC1G_06306
CC1G_06344
CC1G_06350
CC1G_06382
CC1G_06401
CC1G_06424
CC1G_06429
CC1G_06438
CC1G_06456
CC1G_06496
CC1G_06506
CC1G_06520
CC1G_06541
CC1G_06547
CC1G_06548
CC1G_06562
CC1G_06569
CC1G_06571
CC1G_06585
CC1G_06603
CC1G_06620
CC1G_06656
CC1G_06688
CC1G_06716
CC1G_06736
CC1G_06737
CC1G_06748
CC1G_06755
CC1G_06760
CC1G_06761
CC1G_06762
CC1G_06776
CC1G_06777
CC1G_06806
CC1G_06816
CC1G_06829
CC1G_06840
CC1G_06848
CC1G_06856
CC1G_06875
CC1G_06877
CC1G_06897
CC1G_06939
CC1G_06963
CC1G_06972
CC1G_07051
CC1G_07091
CC1G_07094
CC1G_07104
CC1G_07118
CC1G_07119
CC1G_07126
CC1G_07131
CC1G_07135
CC1G_07164
CC1G_07174
CC1G_07290
CC1G_07310
CC1G_07377
CC1G_07382
CC1G_07386
CC1G_07393
CC1G_07402
CC1G_07410
CC1G_07411
CC1G_07429
CC1G_07462
CC1G_07498
CC1G_07633
CC1G_07649
CC1G_07673
CC1G_07689
CC1G_07719
CC1G_07735
CC1G_07749
CC1G_07837
CC1G_07885
CC1G_08023
CC1G_08033
CC1G_08055
CC1G_08125
CC1G_08128
CC1G_08218
CC1G_08304
CC1G_08329
CC1G_08344
CC1G_08357
CC1G_08401
CC1G_08521
CC1G_08597
CC1G_08622
CC1G_08627
CC1G_08649
CC1G_08652
CC1G_08656
CC1G_08689
CC1G_08720
CC1G_08730
CC1G_08744
CC1G_08755
CC1G_08864
CC1G_08865
CC1G_08866
CC1G_08867
CC1G_08869
CC1G_08888
CC1G_08942
CC1G_08994
CC1G_08999
CC1G_09006
CC1G_09009
CC1G_09031
CC1G_09035
CC1G_09069
CC1G_09192
CC1G_09208
CC1G_09235
CC1G_09237
CC1G_09238
CC1G_09240
CC1G_09241
CC1G_09250
CC1G_09323
CC1G_09346
CC1G_09349
CC1G_09430
CC1G_09433
CC1G_09443
CC1G_09457
CC1G_09519
CC1G_09589
CC1G_09897
CC1G_09907
CC1G_09926
CC1G_09934
CC1G_09935
CC1G_09965
CC1G_09969
CC1G_09970
CC1G_10030
CC1G_10034
CC1G_10073
CC1G_10112
CC1G_10191
CC1G_10268
CC1G_10272
CC1G_10274
CC1G_10278
CC1G_10296
CC1G_10306
CC1G_10328
CC1G_10336
CC1G_10337
CC1G_10338
CC1G_10400
CC1G_10403
CC1G_10430
CC1G_10431
CC1G_10506
CC1G_10521
CC1G_10542
CC1G_10549
CC1G_10550
CC1G_10554
CC1G_10571
CC1G_10573
CC1G_10577
CC1G_10584
CC1G_10646
CC1G_10657
CC1G_10680
CC1G_10695
CC1G_10735
CC1G_10805
CC1G_10817
CC1G_10823
CC1G_10859
CC1G_10943
CC1G_10970
CC1G_11029
CC1G_11031
CC1G_11035
CC1G_11036
CC1G_11086
CC1G_11104
CC1G_11111
CC1G_11134
CC1G_11143
CC1G_11199
CC1G_11201
CC1G_11229
CC1G_11264
CC1G_11289
CC1G_11290
CC1G_11299
CC1G_11379
CC1G_11381
CC1G_11395
CC1G_11438
CC1G_11439
CC1G_11465
CC1G_11478
CC1G_11540
CC1G_11644
CC1G_11647
CC1G_11703
CC1G_11709
CC1G_11825
CC1G_11850
CC1G_11859
CC1G_11876
CC1G_11919
CC1G_11929
CC1G_11939
CC1G_11981
CC1G_11986
CC1G_11987
CC1G_12046
CC1G_12062
CC1G_12091
CC1G_12107
CC1G_12129
CC1G_12167
CC1G_12183
CC1G_12235
CC1G_12357
CC1G_12365
CC1G_12366
CC1G_12378
CC1G_12418
CC1G_12439
CC1G_12456
CC1G_12603
CC1G_12638
CC1G_12670
CC1G_12771
CC1G_12964
CC1G_12974
CC1G_13194
CC1G_13212
CC1G_13336
CC1G_13337
CC1G_13461
CC1G_13502
CC1G_13534
CC1G_13670
CC1G_13681
CC1G_13685
CC1G_13711
CC1G_13730
CC1G_13732
CC1G_13741
CC1G_13779
CC1G_13798
CC1G_13815
CC1G_13817
CC1G_13865
CC1G_13900
CC1G_13901
CC1G_13950
CC1G_13956
CC1G_13974
CC1G_13991
CC1G_14132
CC1G_14151
CC1G_14155
CC1G_14173
CC1G_14197
CC1G_14228
CC1G_14232
CC1G_14248
CC1G_14389
CC1G_14391
CC1G_14425
CC1G_14473
CC1G_14570
CC1G_14581
CC1G_14586
CC1G_14594
CC1G_14600
CC1G_14613
CC1G_14616
CC1G_14617
CC1G_14643
CC1G_14657
CC1G_14677
CC1G_14685
CC1G_14703
CC1G_14783
CC1G_14814
CC1G_14816
CC1G_14822
CC1G_14835
CC1G_14852
CC1G_14862
CC1G_14942
CC1G_14951
CC1G_15011
CC1G_15012
CC1G_15019
CC1G_15026
CC1G_15045
CC1G_15051
CC1G_15169
CC1G_15199
CC1G_15212
CC1G_15263
CC1G_15417
CC1G_15507
CC1G_15552
CC1G_15556
CC1G_15558
CC1G_15689
CC1G_15845
CC1G_22001
CC1G_22002
CC1G_22003
CC1G_22004
CC1G_22005
CC1G_22006
CC1G_22007
CC1G_22008
CC1G_22009
CC1G_22010
CC1G_22011
CC1G_22012
CC1G_22013
CC1G_22014
CC1G_22015
CC1G_22016
CC1G_00387
CC1G_00465
CC1G_00707
CC1G_00804
CC1G_01869
CC1G_01888
CC1G_01956
CC1G_02033
CC1G_02471
CC1G_02980
CC1G_03017
CC1G_03160
CC1G_03556
CC1G_03576
CC1G_03590
CC1G_03603
CC1G_03759
CC1G_04156
CC1G_04317
CC1G_04912
CC1G_05166
CC1G_06309
CC1G_06944
CC1G_07049
CC1G_07229
CC1G_07373
CC1G_07431
CC1G_07571
CC1G_07676
CC1G_07922
CC1G_07945
CC1G_07967
CC1G_08697
CC1G_08916
CC1G_09008
CC1G_09374
CC1G_09395
CC1G_09560
CC1G_09674
CC1G_09830
CC1G_09980
CC1G_09983
CC1G_10036
CC1G_10295
CC1G_10387
CC1G_10547
CC1G_10587
CC1G_10621
CC1G_10811
CC1G_10933
CC1G_11152
CC1G_11208
CC1G_11665
CC1G_11856
CC1G_12219
CC1G_12414
CC1G_12469
CC1G_12843
CC1G_13202
CC1G_13267
CC1G_13822
CC1G_13937
CC1G_14489
CC1G_14526
CC1G_14542
CC1G_14868
CC1G_15102
CC1G_15192
CC1G_15326
CC1G_15404
CC1G_15405
CC1G_15550
CC1G_15689
CC1G_15710

## Sheet: mt_GO_AmutBmut
CopciAB_443090
CopciAB_482391
CopciAB_499330
CopciAB_451916
CopciAB_500915
CopciAB_441034
CopciAB_375908
CopciAB_390234
CopciAB_416358
CopciAB_1001180
CopciAB_539374
CopciAB_510463
CopciAB_359580
CopciAB_439610
CopciAB_416205
CopciAB_494654
CopciAB_510372
CopciAB_56261
CopciAB_444674
CopciAB_493132
CopciAB_412402
CopciAB_412330
CopciAB_467829
CopciAB_467826
CopciAB_444570
CopciAB_520581
CopciAB_444503
CopciAB_385907
CopciAB_474027
CopciAB_385864
CopciAB_456279
CopciAB_492942
CopciAB_467686
CopciAB_365495
CopciAB_470294
CopciAB_413961
CopciAB_356997
CopciAB_472061
CopciAB_413807
CopciAB_471999
CopciAB_387550
CopciAB_367359
CopciAB_497612
CopciAB_378531
CopciAB_441790
CopciAB_441795
CopciAB_465599
CopciAB_465602
CopciAB_292047
CopciAB_200640
CopciAB_373942
CopciAB_403259
CopciAB_500128
CopciAB_250636
CopciAB_497777
CopciAB_250685
CopciAB_250742
CopciAB_497791
CopciAB_1001388
CopciAB_249563
CopciAB_449157
CopciAB_379838
CopciAB_392432
CopciAB_362182
CopciAB_455597
CopciAB_495627
CopciAB_414986
CopciAB_494144
CopciAB_358090
CopciAB_9036
CopciAB_388680
CopciAB_358025
CopciAB_437019
CopciAB_437016
CopciAB_358206
CopciAB_360466
CopciAB_360446
CopciAB_360399
CopciAB_464830
CopciAB_485671
CopciAB_360366
CopciAB_421625
CopciAB_421646
CopciAB_400699
CopciAB_499101
CopciAB_16780
CopciAB_487221
CopciAB_447575
CopciAB_365724
CopciAB_365652
CopciAB_421718
CopciAB_214051
CopciAB_380844
CopciAB_494276
CopciAB_358489
CopciAB_437665
CopciAB_506733
CopciAB_494244
CopciAB_494218
CopciAB_451984
CopciAB_498594
CopciAB_455928
CopciAB_206900
CopciAB_357395
CopciAB_450043
CopciAB_270275
CopciAB_357551
CopciAB_474886
CopciAB_474895
CopciAB_493867
CopciAB_493868
CopciAB_493899
CopciAB_357959
CopciAB_283539
CopciAB_357805
CopciAB_414641
CopciAB_357825
CopciAB_282840
CopciAB_355751
CopciAB_193231
CopciAB_469347
CopciAB_493207
CopciAB_191711
CopciAB_474214
CopciAB_356780
CopciAB_413679
CopciAB_471409
CopciAB_237764
CopciAB_493567
CopciAB_448619
CopciAB_420962
CopciAB_525802
CopciAB_364818
CopciAB_164498
CopciAB_363154
CopciAB_504216
CopciAB_449778
CopciAB_501525
CopciAB_170057
CopciAB_496782
CopciAB_376280
CopciAB_500620
CopciAB_472549
CopciAB_487630
CopciAB_541893
CopciAB_471807
CopciAB_248257
CopciAB_367667
CopciAB_367547
CopciAB_449056
CopciAB_544855
CopciAB_440564
CopciAB_377789
CopciAB_446564
CopciAB_448817
CopciAB_459700
CopciAB_386834
CopciAB_363200
CopciAB_540181
CopciAB_374930
CopciAB_501707
CopciAB_374023
CopciAB_415536
CopciAB_438649
CopciAB_494451
CopciAB_463181
CopciAB_368665
CopciAB_374606
CopciAB_425924
CopciAB_441382
CopciAB_422402
CopciAB_497211
CopciAB_227016
CopciAB_448206
CopciAB_478119
CopciAB_227444
CopciAB_366414
CopciAB_495468
CopciAB_442977
CopciAB_364667
CopciAB_420887
CopciAB_446836
CopciAB_439871
CopciAB_374394
CopciAB_464081
CopciAB_288327
CopciAB_498677
CopciAB_399739
CopciAB_473295
CopciAB_501207
CopciAB_465701
CopciAB_424667
CopciAB_424679
CopciAB_449916
CopciAB_266692
CopciAB_538517
CopciAB_467534
CopciAB_350074
CopciAB_419189
CopciAB_393044
CopciAB_495866
CopciAB_444266
CopciAB_499716
CopciAB_543993
CopciAB_477178
CopciAB_363927
CopciAB_457274
CopciAB_420154
CopciAB_468831
CopciAB_496272
CopciAB_445849
CopciAB_404970
CopciAB_87494
CopciAB_121942
CopciAB_457231
CopciAB_445687
CopciAB_483062
CopciAB_479994
CopciAB_461678
CopciAB_354298
CopciAB_537378
CopciAB_436858
CopciAB_353775
CopciAB_461737
CopciAB_492614
CopciAB_473667
CopciAB_461763
CopciAB_4906
CopciAB_385048
CopciAB_473715
CopciAB_438404
CopciAB_438393
CopciAB_372540
CopciAB_454395
CopciAB_452750
CopciAB_494585
CopciAB_359175
CopciAB_539216
CopciAB_332461
CopciAB_464469
CopciAB_371518
CopciAB_374148
CopciAB_469217
CopciAB_443703
CopciAB_378614
CopciAB_378617
CopciAB_455424
CopciAB_376586
CopciAB_454480
CopciAB_542979
CopciAB_470219
CopciAB_365378
CopciAB_480962
CopciAB_500213
CopciAB_490130
CopciAB_361198
CopciAB_391603
CopciAB_454684
CopciAB_361117
CopciAB_417666
CopciAB_361215
CopciAB_417618
CopciAB_497409
CopciAB_360836
CopciAB_417281
CopciAB_465095
CopciAB_539727
CopciAB_360810
CopciAB_91242
CopciAB_274633
CopciAB_408909
CopciAB_503618
CopciAB_469905
CopciAB_354407
CopciAB_441683
CopciAB_468782
CopciAB_421286
CopciAB_413147
CopciAB_445261
CopciAB_498754
CopciAB_502568
CopciAB_375126
CopciAB_400441
CopciAB_488859
CopciAB_432757
CopciAB_362383
CopciAB_467145
CopciAB_483615
CopciAB_361504
CopciAB_361342
CopciAB_454877
CopciAB_395825
CopciAB_497856
CopciAB_497847
CopciAB_449476
CopciAB_397815
CopciAB_407408
CopciAB_433428
CopciAB_541810
CopciAB_448386
CopciAB_358672
CopciAB_494360
CopciAB_485202
CopciAB_465379
CopciAB_411545
CopciAB_441591
CopciAB_465444
CopciAB_357829
CopciAB_493966
CopciAB_357763
CopciAB_357888
CopciAB_357703
CopciAB_357958
CopciAB_357750
CopciAB_387867
CopciAB_387830
CopciAB_409635
CopciAB_366476
CopciAB_439978
CopciAB_359861
CopciAB_485519
CopciAB_494778
CopciAB_494786
CopciAB_390420
CopciAB_440033
CopciAB_475797
CopciAB_416611
CopciAB_359764
CopciAB_440087
CopciAB_121142
CopciAB_466337
CopciAB_361692
CopciAB_466317
CopciAB_540004
CopciAB_361626
CopciAB_119721
CopciAB_372834
CopciAB_496363
CopciAB_429704
CopciAB_374352
CopciAB_538995
CopciAB_370827
CopciAB_462018
CopciAB_426443
CopciAB_366343
CopciAB_497233
CopciAB_443989
CopciAB_467337
CopciAB_467341
CopciAB_495776
CopciAB_362635
CopciAB_445411
CopciAB_492830
CopciAB_236009
CopciAB_474562
CopciAB_538262
CopciAB_413385
CopciAB_234337
CopciAB_234233
CopciAB_356712
CopciAB_379113
CopciAB_483091
CopciAB_463701
CopciAB_445488
CopciAB_540694
CopciAB_363609
CopciAB_369183
CopciAB_273609
CopciAB_373698
CopciAB_444300
CopciAB_502016
CopciAB_460477
CopciAB_441065
CopciAB_405038
CopciAB_442027
CopciAB_358427
CopciAB_494202
CopciAB_499489
CopciAB_443174
CopciAB_356216
CopciAB_447785
CopciAB_493447
CopciAB_168151
CopciAB_450486
CopciAB_118369
CopciAB_441750
CopciAB_433270
CopciAB_443220
CopciAB_377405
CopciAB_432360
CopciAB_470640
CopciAB_285011
CopciAB_284643
CopciAB_534684
CopciAB_441226
CopciAB_449701
CopciAB_368505
CopciAB_368458
CopciAB_368457
CopciAB_442787
CopciAB_139100
CopciAB_540241
CopciAB_466984
CopciAB_418721
CopciAB_362343
CopciAB_380457
CopciAB_502735
CopciAB_375743
CopciAB_430087
CopciAB_178424
CopciAB_457157
CopciAB_178286
CopciAB_496199
CopciAB_363708
CopciAB_538101
CopciAB_356090
CopciAB_474359
CopciAB_476867
CopciAB_495889
CopciAB_489308
CopciAB_370663
CopciAB_372140
CopciAB_400509
CopciAB_472245
CopciAB_472224
CopciAB_497027
CopciAB_17360
CopciAB_17307
CopciAB_462226
CopciAB_142254
CopciAB_467214
CopciAB_399242
CopciAB_454475
CopciAB_380330
CopciAB_494887
CopciAB_360292
CopciAB_475894
CopciAB_416837
CopciAB_360249
CopciAB_435813
CopciAB_354661
CopciAB_441494
CopciAB_354806
CopciAB_411390
CopciAB_543769
CopciAB_427733
CopciAB_449567
CopciAB_472203
CopciAB_453529
CopciAB_494839
CopciAB_368426
CopciAB_542396
CopciAB_472287
CopciAB_373364
CopciAB_373345
CopciAB_499911
CopciAB_1000351
CopciAB_545544
CopciAB_496509
CopciAB_198611
CopciAB_501360
CopciAB_399221
CopciAB_450372
CopciAB_503237
CopciAB_373270
CopciAB_499885
CopciAB_497172
CopciAB_400094
CopciAB_396722
CopciAB_372371
CopciAB_543812
CopciAB_285312
CopciAB_285278
CopciAB_443014
CopciAB_367215
CopciAB_471585
CopciAB_1000901
CopciAB_437744
CopciAB_432313
CopciAB_406267
CopciAB_416916
CopciAB_449269
CopciAB_368409
CopciAB_259283
CopciAB_439959
CopciAB_447941
CopciAB_497048
CopciAB_447914
CopciAB_44390
CopciAB_44336
CopciAB_373125
CopciAB_502533
CopciAB_392073
CopciAB_366685
CopciAB_471105
CopciAB_478386
CopciAB_530093
CopciAB_355822
CopciAB_430735
CopciAB_464757
CopciAB_371623
CopciAB_499996
CopciAB_7036
CopciAB_537505
CopciAB_499677
CopciAB_402119
CopciAB_402123
CopciAB_445528
CopciAB_420644
CopciAB_446420
CopciAB_443241
CopciAB_377589
CopciAB_196908
CopciAB_491362
CopciAB_492498
CopciAB_363763
CopciAB_363693
CopciAB_420074
CopciAB_223999
CopciAB_358593
CopciAB_545855
CopciAB_380266
CopciAB_147126
CopciAB_499745
CopciAB_497974
CopciAB_355586
CopciAB_374102
CopciAB_452092
CopciAB_432344
CopciAB_464504
CopciAB_422158
CopciAB_448051
CopciAB_497099
CopciAB_478008
CopciAB_501208
CopciAB_269110
CopciAB_357313
CopciAB_357200
CopciAB_254822
CopciAB_472012
CopciAB_360998
CopciAB_434577
CopciAB_122698
CopciAB_430573
CopciAB_357994
CopciAB_410966
CopciAB_461686
CopciAB_361213
CopciAB_1000428
CopciAB_445846
CopciAB_373379
CopciAB_359391
CopciAB_386792
CopciAB_446424
CopciAB_356069
CopciAB_356471
CopciAB_392072
CopciAB_361652
CopciAB_438589
CopciAB_472156
CopciAB_423922
CopciAB_462738
CopciAB_115338
CopciAB_458943
CopciAB_545096
CopciAB_539369
CopciAB_439589
CopciAB_439559
CopciAB_355021
CopciAB_355558
CopciAB_355503
CopciAB_385888
CopciAB_421532
CopciAB_365627
CopciAB_415201
CopciAB_358343
CopciAB_500899
CopciAB_446779
CopciAB_522776
CopciAB_449179
CopciAB_379857
CopciAB_410399
CopciAB_501015
CopciAB_374765
CopciAB_493365
CopciAB_413057
CopciAB_493391
CopciAB_362075
CopciAB_370023
CopciAB_365365
CopciAB_495485
CopciAB_278770
CopciAB_501865
CopciAB_403600
CopciAB_382442
CopciAB_463299
CopciAB_465102
CopciAB_492977
CopciAB_458586
CopciAB_361036
CopciAB_468628
CopciAB_475005
CopciAB_191140
CopciAB_448649
CopciAB_465232
CopciAB_383677
CopciAB_540189
CopciAB_222978
CopciAB_446815
CopciAB_446838
CopciAB_446855
CopciAB_371091
CopciAB_368906
CopciAB_354296
CopciAB_436360
CopciAB_361309
CopciAB_368055
CopciAB_186783
CopciAB_452062
CopciAB_442228
CopciAB_559334
CopciAB_478544
CopciAB_445432
CopciAB_374
CopciAB_436798
CopciAB_497001
CopciAB_464908
CopciAB_476624
CopciAB_501474
CopciAB_545067
CopciAB_461481
CopciAB_452781
CopciAB_373555
CopciAB_540317
CopciAB_494863
CopciAB_31613
CopciAB_478851
CopciAB_432170
CopciAB_400918
CopciAB_483436
CopciAB_291372
CopciAB_427108
CopciAB_1002309
CopciAB_457218
CopciAB_440703
CopciAB_543653
CopciAB_358558
CopciAB_503975
CopciAB_432177
CopciAB_406427
CopciAB_482713
CopciAB_348218
CopciAB_500564
CopciAB_381928
CopciAB_228567
CopciAB_445901
CopciAB_418410
CopciAB_37449
CopciAB_1002192
CopciAB_374316

## Sheet: mt_DeepLoc
CopciAB_485519
CopciAB_491362
CopciAB_439611
CopciAB_370663
CopciAB_392072
CopciAB_495889
CopciAB_494654
CopciAB_386834
CopciAB_164498
CopciAB_357087
CopciAB_475510
CopciAB_449157
CopciAB_359389
CopciAB_414986
CopciAB_401749
CopciAB_450865
CopciAB_361198
CopciAB_472061
CopciAB_360836
CopciAB_119721
CopciAB_44390
CopciAB_429704
CopciAB_493899
CopciAB_499900
CopciAB_386792
CopciAB_494276
CopciAB_355751
CopciAB_438393
CopciAB_401638
CopciAB_483615
CopciAB_493132
CopciAB_497454
CopciAB_372371
CopciAB_461763
CopciAB_356216
CopciAB_492901
CopciAB_442356
CopciAB_539369
CopciAB_441795
CopciAB_420962
CopciAB_437196
CopciAB_358593
CopciAB_416837
CopciAB_494887
CopciAB_461318
CopciAB_439589
CopciAB_358343
CopciAB_466984
CopciAB_379113
CopciAB_444629
CopciAB_441259
CopciAB_367547
CopciAB_500388
CopciAB_492614
CopciAB_90000
CopciAB_354298
CopciAB_437439
CopciAB_364058
CopciAB_505578
CopciAB_234233
CopciAB_385900
CopciAB_444266
CopciAB_494458
CopciAB_476959
CopciAB_454395
CopciAB_380330
CopciAB_496605
CopciAB_465517
CopciAB_359861
CopciAB_447785
CopciAB_413961
CopciAB_528942
CopciAB_438272
CopciAB_449179
CopciAB_543993
CopciAB_499956
CopciAB_487630
CopciAB_390202
CopciAB_109229
CopciAB_421367
CopciAB_363693
CopciAB_361652
CopciAB_150122
CopciAB_441034
CopciAB_362383
CopciAB_413807
CopciAB_472203
CopciAB_366343
CopciAB_444570
CopciAB_473763
CopciAB_362592
CopciAB_358025
CopciAB_266692
CopciAB_542406
CopciAB_530093
CopciAB_537377
CopciAB_494685
CopciAB_223999
CopciAB_474214
CopciAB_400699
CopciAB_443174
CopciAB_366685
CopciAB_541893
CopciAB_368457
CopciAB_390420
CopciAB_449916
CopciAB_368062
CopciAB_433428
CopciAB_502735
CopciAB_98230
CopciAB_434085
CopciAB_400441
CopciAB_545096
CopciAB_462018
CopciAB_447941
CopciAB_494778
CopciAB_510372
CopciAB_409635
CopciAB_474027
CopciAB_448876
CopciAB_453529
CopciAB_332461
CopciAB_17360
CopciAB_444503
CopciAB_444674
CopciAB_379243
CopciAB_417666
CopciAB_448206
CopciAB_497791
CopciAB_288327
CopciAB_502568
CopciAB_475797
CopciAB_356090
CopciAB_494786
CopciAB_420644
CopciAB_360490
CopciAB_441750
CopciAB_450486
CopciAB_356712
CopciAB_403259
CopciAB_410997
CopciAB_213255
CopciAB_510463
CopciAB_439663
CopciAB_467145
CopciAB_418402
CopciAB_286471
CopciAB_525239
CopciAB_375908
CopciAB_378072
CopciAB_501813
CopciAB_482660
CopciAB_474359
CopciAB_477178
CopciAB_420074
CopciAB_494218
CopciAB_357958
CopciAB_129746
CopciAB_357395
CopciAB_373270
CopciAB_363609
CopciAB_539666
CopciAB_472767
CopciAB_470640
CopciAB_413679
CopciAB_471409
CopciAB_448191
CopciAB_354663
CopciAB_413385
CopciAB_540004
CopciAB_377874
CopciAB_520581
CopciAB_441257
CopciAB_494144
CopciAB_288054
CopciAB_415536
CopciAB_454480
CopciAB_464105
CopciAB_482475
CopciAB_435813
CopciAB_494711
CopciAB_377405
CopciAB_454475
CopciAB_118369
CopciAB_121942
CopciAB_378531
CopciAB_237764
CopciAB_538262
CopciAB_372140
CopciAB_546731
CopciAB_497987
CopciAB_499885
CopciAB_360292
CopciAB_430087
CopciAB_116432
CopciAB_115338
CopciAB_437744
CopciAB_522776
CopciAB_493447
CopciAB_471341
CopciAB_433270
CopciAB_374102
CopciAB_503618
CopciAB_393044
CopciAB_498754
CopciAB_249563
CopciAB_472156
CopciAB_500849
CopciAB_377589
CopciAB_442940
CopciAB_539937
CopciAB_441591
CopciAB_492498
CopciAB_478114
CopciAB_495509
CopciAB_354806
CopciAB_443220
CopciAB_373977
CopciAB_472717
CopciAB_467341
CopciAB_465444
CopciAB_497856
CopciAB_248257
CopciAB_368194
CopciAB_450150
CopciAB_496363
CopciAB_357703
CopciAB_388680
CopciAB_483569
CopciAB_357200
CopciAB_499911
CopciAB_411247
CopciAB_439959
CopciAB_468831
CopciAB_440033
CopciAB_492830
CopciAB_448817
CopciAB_411144
CopciAB_469621
CopciAB_497099
CopciAB_208505
CopciAB_466573
CopciAB_542084
CopciAB_421718
CopciAB_480962
CopciAB_200640
CopciAB_496964
CopciAB_2714
CopciAB_493829
CopciAB_542979
CopciAB_486158
CopciAB_369183
CopciAB_23018
CopciAB_374023
CopciAB_357551
CopciAB_14270
CopciAB_440496
CopciAB_121142
CopciAB_17307
CopciAB_438046
CopciAB_367417
CopciAB_494202
CopciAB_465095
CopciAB_403600
CopciAB_537868
CopciAB_538658
CopciAB_366414
CopciAB_480561
CopciAB_423870
CopciAB_540245
CopciAB_496272
CopciAB_451916
CopciAB_416205
CopciAB_495776
CopciAB_359764
CopciAB_442787
CopciAB_449476
CopciAB_439871
CopciAB_191711
CopciAB_414641
CopciAB_350074
CopciAB_397815
CopciAB_495607
CopciAB_438078
CopciAB_361626
CopciAB_359835
CopciAB_372834
CopciAB_360996
CopciAB_419189
CopciAB_374352
CopciAB_474562
CopciAB_357837
CopciAB_428312
CopciAB_364719
CopciAB_444455
CopciAB_424667
CopciAB_363927
CopciAB_372540
CopciAB_471105
CopciAB_470294
CopciAB_499101
CopciAB_446268
CopciAB_357829
CopciAB_460942
CopciAB_496875
CopciAB_368505
CopciAB_449778
CopciAB_400509
CopciAB_430735
CopciAB_386955
CopciAB_488859
CopciAB_360446
CopciAB_227444
CopciAB_120499
CopciAB_433383
CopciAB_541099
CopciAB_385631
CopciAB_426863
CopciAB_440564
CopciAB_394838
CopciAB_545855
CopciAB_439978
CopciAB_274633
CopciAB_357974
CopciAB_467826
CopciAB_417281
CopciAB_365652
CopciAB_501015
CopciAB_371128
CopciAB_292614
CopciAB_142254
CopciAB_534684
CopciAB_496782
CopciAB_437019
CopciAB_493955
CopciAB_446836
CopciAB_421532
CopciAB_354720
CopciAB_461686
CopciAB_387550
CopciAB_409150
CopciAB_537378
CopciAB_487157
CopciAB_463181
CopciAB_495903
CopciAB_365724
CopciAB_361863
CopciAB_454564
CopciAB_540241
CopciAB_364811
CopciAB_543769
CopciAB_526570
CopciAB_446188
CopciAB_497777
CopciAB_363708
CopciAB_472619
CopciAB_457231
CopciAB_402849
CopciAB_168151
CopciAB_188782
CopciAB_399242
CopciAB_539717
CopciAB_361117
CopciAB_452121
CopciAB_16780
CopciAB_425902
CopciAB_253399
CopciAB_357888
CopciAB_284643
CopciAB_445870
CopciAB_438649
CopciAB_354355
CopciAB_362925
CopciAB_545544
CopciAB_377150
CopciAB_474503
CopciAB_441338
CopciAB_389562
CopciAB_493207
CopciAB_448619
CopciAB_455928
CopciAB_495485
CopciAB_371073
CopciAB_466349
CopciAB_362856
CopciAB_499330
CopciAB_357959
CopciAB_439634
CopciAB_497409
CopciAB_427733
CopciAB_407408
CopciAB_83560
CopciAB_424679
CopciAB_411390
CopciAB_539216
CopciAB_234337
CopciAB_374765
CopciAB_356069
CopciAB_399191
CopciAB_526900
CopciAB_374995
CopciAB_442932
CopciAB_474202
CopciAB_445528
CopciAB_510421
CopciAB_44336
CopciAB_500556
CopciAB_473667
CopciAB_465969
CopciAB_460477
CopciAB_493868
CopciAB_544408
CopciAB_538517
CopciAB_447914
CopciAB_499499
CopciAB_254738
CopciAB_365907
CopciAB_396722
CopciAB_363200
CopciAB_420301
CopciAB_365763
CopciAB_4906
CopciAB_48744
CopciAB_433472
CopciAB_283139
CopciAB_474895
CopciAB_495468
CopciAB_227016
CopciAB_362343
CopciAB_446420
CopciAB_375000
CopciAB_468186
CopciAB_384200
CopciAB_501865
CopciAB_457282
CopciAB_400094
CopciAB_368665
CopciAB_215807
CopciAB_17315
CopciAB_367029
CopciAB_394392
CopciAB_445785
CopciAB_411545
CopciAB_387830
CopciAB_503237
CopciAB_354748
CopciAB_437016
CopciAB_365627
CopciAB_449567
CopciAB_540784
CopciAB_358427
CopciAB_408909
CopciAB_471999
CopciAB_539874
CopciAB_494823
CopciAB_63600
CopciAB_392073
CopciAB_479994
CopciAB_441065
CopciAB_462146
CopciAB_410966
CopciAB_473715
CopciAB_432360
CopciAB_360810
CopciAB_187384
CopciAB_539340
CopciAB_194471
CopciAB_377789
CopciAB_358489
CopciAB_445011
CopciAB_461737
CopciAB_469905
CopciAB_465379
CopciAB_473094
CopciAB_454877
CopciAB_380457
CopciAB_247486
CopciAB_502514
CopciAB_494813
CopciAB_463269
CopciAB_441382
CopciAB_494585
CopciAB_68834
CopciAB_354219
CopciAB_379015
CopciAB_368426
CopciAB_395825
CopciAB_397298
CopciAB_493567
CopciAB_523984
CopciAB_463387
CopciAB_362075
CopciAB_385864
CopciAB_368458
CopciAB_464895
CopciAB_56261
CopciAB_466153
CopciAB_370827
CopciAB_542396
CopciAB_364818
CopciAB_415201
CopciAB_485671
CopciAB_356043
CopciAB_483091
CopciAB_358873
CopciAB_480149
CopciAB_402624
CopciAB_355291
CopciAB_470219
CopciAB_214324
CopciAB_449298
CopciAB_380639
CopciAB_495940
CopciAB_449128
CopciAB_371955
CopciAB_412768
CopciAB_537505
CopciAB_416611
CopciAB_543812
CopciAB_243136
CopciAB_357994
CopciAB_439669
CopciAB_467214
CopciAB_454684
CopciAB_392432
CopciAB_354692
CopciAB_16635
CopciAB_412843
CopciAB_438404
CopciAB_504188
CopciAB_445411
CopciAB_365365
CopciAB_500888
CopciAB_495203
CopciAB_443014
CopciAB_495447
CopciAB_473115
CopciAB_188589
CopciAB_464479
CopciAB_496741
CopciAB_452750
CopciAB_458845
CopciAB_410399
CopciAB_412402
CopciAB_367667
CopciAB_360506
CopciAB_367082
CopciAB_533180
CopciAB_440448
CopciAB_85133
CopciAB_374148
CopciAB_463114
CopciAB_499677
CopciAB_502284
CopciAB_538101
CopciAB_449735
CopciAB_462412
CopciAB_445261
CopciAB_366697
CopciAB_425924
CopciAB_55997
CopciAB_495866
CopciAB_330709
CopciAB_450056
CopciAB_465701
CopciAB_363154
CopciAB_413648
CopciAB_355311
CopciAB_432170
CopciAB_490130
CopciAB_472287
CopciAB_506733
CopciAB_376586
CopciAB_473295
CopciAB_461315
CopciAB_423922
CopciAB_374606
CopciAB_503606
CopciAB_435066
CopciAB_19646
CopciAB_363541
CopciAB_478119
CopciAB_494086
CopciAB_360366
CopciAB_436858
CopciAB_236009
CopciAB_493365
CopciAB_509021
CopciAB_499489
CopciAB_147126
CopciAB_354407
CopciAB_374416
CopciAB_370298
CopciAB_358921
CopciAB_259283
CopciAB_545148
CopciAB_489308
CopciAB_494360
CopciAB_445488
CopciAB_399221
CopciAB_493966
CopciAB_390234
CopciAB_445263
CopciAB_539990
CopciAB_463686
CopciAB_421625
CopciAB_451033
CopciAB_169819
CopciAB_444356
CopciAB_436853
CopciAB_474886
CopciAB_9054
CopciAB_469217
CopciAB_364901
CopciAB_472823
CopciAB_475379
CopciAB_176548
CopciAB_440037
CopciAB_355558
CopciAB_450219
CopciAB_494394
CopciAB_361215
CopciAB_445492
CopciAB_541810
CopciAB_258614
CopciAB_7036
CopciAB_447041
CopciAB_126253
CopciAB_500636
CopciAB_482391
CopciAB_270275
CopciAB_16198
CopciAB_449209
CopciAB_428031
CopciAB_379227
CopciAB_463240
CopciAB_216726
CopciAB_440768
CopciAB_466568
CopciAB_26826
CopciAB_463299
CopciAB_438589
CopciAB_530292

## Sheet: mt_TargetP
CopciAB_493132
CopciAB_494654
CopciAB_409635
CopciAB_367547
CopciAB_387550
CopciAB_385900
CopciAB_400441
CopciAB_388680
CopciAB_4906
CopciAB_448191
CopciAB_356712
CopciAB_433270
CopciAB_441795
CopciAB_358593
CopciAB_253399
CopciAB_492830
CopciAB_474027
CopciAB_412843
CopciAB_494458
CopciAB_386834
CopciAB_400094
CopciAB_545096
CopciAB_379113
CopciAB_372371
CopciAB_440033
CopciAB_492901
CopciAB_538101
CopciAB_121942
CopciAB_400509
CopciAB_359764
CopciAB_494778
CopciAB_448206
CopciAB_400699
CopciAB_429704
CopciAB_501813
CopciAB_455928
CopciAB_386792
CopciAB_390420
CopciAB_487630
CopciAB_445870
CopciAB_465517
CopciAB_191711
CopciAB_401749
CopciAB_374102
CopciAB_445785
CopciAB_483615
CopciAB_428312
CopciAB_540245
CopciAB_433428
CopciAB_360446
CopciAB_461737
CopciAB_360836
CopciAB_495776
CopciAB_358025
CopciAB_187384
CopciAB_356216
CopciAB_150122
CopciAB_444503
CopciAB_443220
CopciAB_437019
CopciAB_14270
CopciAB_492614
CopciAB_454395
CopciAB_450150
CopciAB_360292
CopciAB_413679
CopciAB_443174
CopciAB_541893
CopciAB_372834
CopciAB_370827
CopciAB_413961
CopciAB_403600
CopciAB_416205
CopciAB_502568
CopciAB_446268
CopciAB_468831
CopciAB_478114
CopciAB_387830
CopciAB_354748
CopciAB_483569
CopciAB_448619
CopciAB_439589
CopciAB_397815
CopciAB_540241
CopciAB_433472
CopciAB_501015
CopciAB_357829
CopciAB_444674
CopciAB_362075
CopciAB_393044
CopciAB_378531
CopciAB_411247
CopciAB_368665
CopciAB_454867
CopciAB_413385
CopciAB_539666
CopciAB_542406
CopciAB_357959
CopciAB_448817
CopciAB_430735
CopciAB_288327
CopciAB_497099
CopciAB_471105
CopciAB_363927
CopciAB_475797
CopciAB_461763
CopciAB_454475
CopciAB_421532
CopciAB_545855
CopciAB_413807
CopciAB_437196
CopciAB_283139
CopciAB_63600
CopciAB_449179
CopciAB_452121
CopciAB_129746
CopciAB_538262
CopciAB_441591
CopciAB_115338
CopciAB_448876
CopciAB_497777
CopciAB_362592
CopciAB_377589
CopciAB_449476
CopciAB_449157
CopciAB_441338
CopciAB_493829
CopciAB_539369
CopciAB_237764
CopciAB_449778
CopciAB_544408
CopciAB_423870
CopciAB_439611
CopciAB_497454
CopciAB_416837
CopciAB_522776
CopciAB_462018
CopciAB_442932
CopciAB_465095
CopciAB_366685
CopciAB_418402
CopciAB_215807
CopciAB_249563
CopciAB_467341
CopciAB_430087
CopciAB_464895
CopciAB_466349
CopciAB_464479
CopciAB_363708
CopciAB_510372
CopciAB_248257
CopciAB_465379
CopciAB_357551
CopciAB_494823
CopciAB_472619
CopciAB_399191
CopciAB_407408
CopciAB_357703
CopciAB_357958
CopciAB_369183
CopciAB_485519
CopciAB_425902
CopciAB_447785
CopciAB_368457
CopciAB_470219
CopciAB_494144
CopciAB_357200
CopciAB_466984
CopciAB_545544
CopciAB_442940
CopciAB_458845
CopciAB_362343
CopciAB_354663
CopciAB_498754
CopciAB_466153
CopciAB_500556
CopciAB_188782
CopciAB_496605
CopciAB_360996
CopciAB_492498
CopciAB_474895
CopciAB_223999
CopciAB_472767
CopciAB_501865
CopciAB_23018
CopciAB_454480
CopciAB_494685
CopciAB_234233
CopciAB_408909
CopciAB_424679
CopciAB_373977
CopciAB_85133
CopciAB_450486
CopciAB_374023
CopciAB_499956
CopciAB_441259
CopciAB_194471
CopciAB_366476
CopciAB_510421
CopciAB_530093
CopciAB_482475
CopciAB_461318
CopciAB_361198
CopciAB_414986
CopciAB_540004
CopciAB_380330
CopciAB_446188
CopciAB_17360
CopciAB_497856
CopciAB_359835
CopciAB_500849
CopciAB_444570
CopciAB_402849
CopciAB_367417
CopciAB_477178
CopciAB_120499
CopciAB_494887
CopciAB_441034
CopciAB_472717
CopciAB_420644
CopciAB_439978
CopciAB_386955
CopciAB_451916
CopciAB_496363
CopciAB_480962
CopciAB_457193
CopciAB_446836
CopciAB_411144
CopciAB_414641
CopciAB_385864
CopciAB_499885
CopciAB_421718
CopciAB_274633
CopciAB_503237
CopciAB_496782
CopciAB_378072
CopciAB_377789
CopciAB_109229
CopciAB_461686
CopciAB_441750
CopciAB_439959
CopciAB_234337
CopciAB_495468
CopciAB_542084
CopciAB_439871
CopciAB_374765
CopciAB_474562
CopciAB_438272
CopciAB_444266
CopciAB_370663
CopciAB_439954
CopciAB_464105
CopciAB_474359
CopciAB_440496
CopciAB_447914
CopciAB_438393
CopciAB_213255
CopciAB_359861
CopciAB_499101
CopciAB_365627
CopciAB_410997
CopciAB_354355
CopciAB_116432
CopciAB_503618
CopciAB_28769
CopciAB_528942
CopciAB_539717
CopciAB_364811
CopciAB_392073
CopciAB_420301
CopciAB_415536
CopciAB_441645
CopciAB_361626
CopciAB_444826
CopciAB_390202
CopciAB_122698
CopciAB_358489
CopciAB_518017
CopciAB_366297
CopciAB_487157
CopciAB_286471
CopciAB_539937
CopciAB_401638
CopciAB_424919
CopciAB_357395
CopciAB_472287
CopciAB_472061
CopciAB_372140
CopciAB_142254
CopciAB_459251
CopciAB_361213
CopciAB_439682
CopciAB_417666
CopciAB_358355
CopciAB_440564
CopciAB_389562
CopciAB_520581
CopciAB_442787
CopciAB_483091
CopciAB_493447
CopciAB_460942
CopciAB_200640
CopciAB_525239
CopciAB_374352
CopciAB_98230
CopciAB_358510
CopciAB_497987
CopciAB_435066
CopciAB_17307
CopciAB_467149
CopciAB_468546
CopciAB_365412
CopciAB_543769
CopciAB_510463
CopciAB_356069
CopciAB_164498
CopciAB_19646
CopciAB_421367
CopciAB_465612
CopciAB_450056
CopciAB_484666
